# Supplementary material
Source: Research Square preprint supplement (doi:10.21203/rs.3.rs-10059854/v1)
Supplement: Supplementary file 1 [file 1e3a64e93ad2ff0d0a1cd0e9.docx]

Supplementary Materials

**Psychological stress and dysmenorrhea: A Systematic Review and Meta-analysis**

**Author:**
Hira Khalid **Asghar**1*

**Corresponding Author:**
Hira Khalid Asghar
Email: hirakhalid23@outlook.com

# Search Strategy

A comprehensive search strategy was done across PubMed, Google Scholar, Cochrane Library (CENTRAL), PsychINFO, Clinicaltrials.gov, medRxiv, and open science framework (OSF). Searches were done between 20 June 2025 and 30 June 2025. Search strategies combined terms were related to primary dysmenorrhea, psychological stress, anxiety and related emotional terms using data specified vocabulary and terms. No language or publication year restrictions were applied. Detail is given below.

| **Database** | **Date** | **Search String** | **Filters** | **Record retrieved** |
| --- | --- | --- | --- | --- |
| PubMed | 20 June 2025 | ("Primary Dysmenorrhea" OR "menstrual pain" OR "period pain")  AND  ("Stress, Psychological" OR stress* OR anxiety OR "emotional stress")  AND  (women OR female* OR adolescent*)  stress* → stress, stresses, stressful  pain* → pain, pains, painful  adolescen* → adolescent, adolescents  (stress* OR anxiety OR "emotional stress") AND (dysmenorrhea OR "period pain")  (wom?n OR females OR girls) AND (stress* OR anxiety)  ("Primary Dysmenorrhea" OR "menstrual pain" OR dysmenorrhea)  AND  ("Stress, Psychological" OR stress* OR anxiety OR "emotional stress")  AND  ("Adolescent" OR adolescent* OR teen* OR girls)  AND  ("Women"[MeSH] OR wom?n OR female*)  "Primary Dysmenorrhea" AND "Stress, Psychological" AND ("Women" OR "Adolescent" )  1. "Primary Dysmenorrhea" AND "Stress, Psychological"  2. "Primary Dysmenorrhea" AND (stress OR anxiety OR "emotional stress")  3. (“period pain” OR “menstrual pain”) AND (stress OR anxiety) | None | 5713 |
| Google Scholar | 23 June 2025 | ("psychological stress" OR "emotional stress" OR anxiety OR depression OR stress*)  AND  ("primary dysmenorrhea" OR "menstrual pain" OR "period pain" OR "menstrual cramps")  AND  (women OR girls OR adolescents OR females)  ("psychological stress" OR "emotional stress")  AND ("primary dysmenorrhea" OR "menstrual cramps")  AND (women OR girls OR adolescents)  (anxiety OR depression)  AND ("menstrual pain" OR "period pain")  AND (females OR adolescents)  (stress*)  AND ("menstrual pain" OR "period pain" OR "menstrual cramps")  AND (girls OR women)  ("emotional stress" OR anxiety OR depression)  AND ("primary dysmenorrhea")  AND (adolescents OR girls) | None | 496 |
| Cochrane library | 24 June 2025 | ("psychological stress" OR "emotional stress" OR anxiety OR depression OR stress*)  AND  ("primary dysmenorrhea" OR "menstrual pain" OR "period pain" OR "menstrual cramps")  AND  (women OR girls OR adolescents OR females)  (stress* OR depress* OR anxi* OR "emotional strain")  AND  (dysmenorrh* OR "menstrual pain" OR "period pain" OR cramps*)  AND  (female* OR women OR adolescent*)  (MH "Stress, Psychological" OR stress* OR anxi* OR depress*)  AND  (MH "Dysmenorrhea" OR dysmenorrhea OR cramps* OR "period pain")  AND  (women OR girls OR females)  ("psychological stress" OR "mental strain" OR stress* OR "emotional pressure")  AND  (dysmenorrh* OR "menstrual pain" OR "period pain" OR "menstrual cramps")  AND  (woman OR women OR female OR girl OR adolescent) | None | 40 |
| PsychINFO | 24 June 2025 | ("psychological stress" OR "emotional stress" OR anxiety OR depression OR stress*)  AND  ("primary dysmenorrhea" OR "menstrual pain" OR "period pain" OR "menstrual cramps")  AND  (women OR girls OR adolescents OR females)  (stress* OR anxious OR depress* OR mood)  AND  (dysmenorrhea OR "period pain" OR cramps)  AND  (female* OR adolescent* OR teen*)  ("emotional stress" OR "psychologic* stress" OR depressi?n)  AND  ("menstr?al pain" OR "period cramp*" OR dysmenorrhea) | None | 594 |
| Clinicaltrials.gov | 25 June 2025 | Condition/ disease - dysmenorrhea  Other terms - psychological stress , emotional stress , perceived stress , stress management  Condition / disease - menstrual pain  Other terms - emotional stress , anxiety | None | 110 |
| medRxiv | 25 June 2025 | "psychological stress" AND "primary dysmenorrhea"  • "emotional stress" AND "menstrual pain"  • "depression" AND "period pain" AND adolescent  • "stress" AND "menstrual cramps" AND female | None | 291 |
| OSF | 25 June 2025 | psychological stress AND menstrual pain  depression AND dysmenorrhea | None | 5 |

# Protocol for a Systematic Review and Meta-analysis: A Practical Guide

**Psychological Stress and Primary Dysmenorrhea: Evidence from Interventional and Observational Studies**

1. **Background and Rationale**

Primary dysmenorrhea is common among adolescent girls and women of reproductive age. It refers to painful menstruation that occurs without any underlying pelvic disease. In addition to physical pain, those with dysmenorrhea often experience psychological distress such as stress, anxiety, and emotional difficulties. These factors can make the pain feel worse and disrupt daily life.

Research shows there is a two-way relationship between psychological stress and menstrual pain. Stress can affect dysmenorrhea through changes in hormones, how pain is processed, inflammation, and behavior. At the same time, ongoing menstrual pain can also increase stress, leading to more psychological strain and a lower quality of life.

Intervention studies have tested ways to reduce stress, including exercise, yoga, mind–body therapies, and psychological treatments. Observational studies have also found links between stress and how severe dysmenorrhea is. However, the results vary a lot between studies, and there hasn’t yet been a thorough review pulling all this evidence together.

There is a need for a systematic review that brings together evidence from randomized trials, non-randomized intervention studies, and observational research. Such a review can help clarify how psychological stress and primary dysmenorrhea are related, whether targeting stress can help reduce pain, and how these factors affect quality of life.

1. **Objectives**

**2.1 Primary Objective**

To thoroughly examine how psychological stress and primary dysmenorrhea are connected, and to find out if interventions that focus on reducing stress can ease menstrual pain and lower stress levels.

**2.2 Secondary Objectives**
• To see how psychological stress and stress-reducing interventions affect quality of life and day-to-day functioning

• To summarize evidence from observational studies about how stress relates to/cause the severity or presence of dysmenorrhea

• To look at whether different types of interventions work better than others

• To check how reliable the findings are by running sensitivity analyses

1. **Review Questions**
   1. How are psychological stress and menstrual pain connected in people with primary dysmenorrhea?
   2. Can interventions that target stress actually reduce menstrual pain or stress compared to not intervening?

3. What impact does psychological stress have on quality of life and daily functioning in those with primary dysmenorrhea?

1. **Eligibility Criteria**

**4.1 Population**

This review focused on adolescent girls and women of reproductive age who have primary dysmenorrhea, meaning they experience menstrual pain with no known pelvic disease.

**4.2 Exposure / Intervention**
• Psychological or emotional stress, anxiety, and similar experiences

• Treatments specifically aimed at lowering stress, such as exercise, yoga, mind–body therapies, or psychological and stress management programs

**4.3 Comparators**
• Groups receiving no intervention, standard care, a placebo

• Observational studies, whether or not they included a comparison group

**4.4 Outcomes**

**Primary outcomes**

• How severe or intense the menstrual pain is

• Levels of psychological stress or related effects

**Secondary outcomes**
• Quality of life
• Functional impairment or daily activity limitation

**4.5 Study Designs**
• Randomized controlled trials
• Non-randomized intervention studies, like before-and-after studies

• Observational studies, including cross-sectional, cohort, or case-control designs

**4.6 Exclusion Criteria**
• Secondary dysmenorrhea (such as pain due to endometriosis or fibroids)
• Pregnant or postmenopausal individuals

• Animal or lab studies
• Reviews, editorials, case reports, or conference abstracts that don’t have full data
• Retracted papers or those with no available full text

1. **Information Sources**

I planned to search several sources for relevant studies, including PubMed, Google Scholar, the Cochrane Library (CENTRAL), PsycINFO, ClinicalTrials.gov, medRxiv, and the Open Science Framework (OSF).

1. **Search Strategy**

I created a thorough search plan using both official subject terms and everyday language. The main concepts were primary dysmenorrhea (like “primary dysmenorrhea”, “menstrual pain”, or “period pain”), psychological stress (such as “psychological stress”, “anxiety”, or “emotional stress”), and population terms (like “women”, “female”, “adolescent”).

I adapted the search strategies to fit each database, and planned to include the full search terms in the supplementary materials.

1. **Study Selection**

All the search results were imported into reference management software to remove duplicates. I first screened titles and abstracts to see if they were relevant, and then checked the full text of studies that looked promising. Study selection was done by a single reviewer using the set eligibility criteria.

1. **Data Extraction**

I planned to use a standard data collection form to extract information from each study. This included details about the study (author, year, country, design), participant information (age, sample size), what the intervention or exposure was, how outcomes were measured, effect estimates (like means, standard deviations, odds ratios, correlations, and confidence intervals), and how long participants were followed.

1. **Risk of Bias Assessment**

I planned to assess the risk of bias for each study based on its design. For randomized trials, I used the Cochrane Risk of Bias 2 (RoB 2) tool; for non-randomized intervention studies, I used the ROBINS-I tool; and for observational studies, I used the Newcastle–Ottawa Scale (NOS), adapting it as needed for different study types.

I planned to report the results of the bias assessments in words, and visually where it made sense.

1. **Data Synthesis**

**10.1 Quantitative Synthesis**

If the studies were similar enough, I planned to carry out meta-analyses using a random-effects model. For outcomes measured on a continuous scale, I intended to combine them using standardized mean differences and 95% confidence intervals.

I planned to synthesize pain and stress outcomes separately to provide clearer, focused results for each type of outcome.

**10.2 Subgroup Analyses**

Subgroup analyses were designed to compare different types of interventions, such as exercise-based, mind–body, or psychological approaches, to see if effects varied depending on the intervention.

**10.3 Sensitivity Analyses**

To check how robust the pooled results were, I planned to conduct sensitivity analyses by removing studies that were judged to have a high risk of bias.

**10.4 Narrative Synthesis**

If it was not possible to do a meta-analysis, I planned to summarize the findings narratively, following Cochrane guidelines, and focus on the direction and consistency of the effects reported in the studies.

1. **Assessment of Certainty of Evidence**

I planned to assess how certain the evidence was for each main outcome using the GRADE approach. This method considers things like risk of bias, differences between study results, indirectness, imprecision, and publication bias. I also aimed to summarize these assessments in a table.

1. **Reporting and Dissemination**

I planned to write up the review following PRISMA 2020 guidelines. The findings were meant to be submitted to a peer-reviewed journal and shared with both clinicians and researchers.

1. **Protocol Registration**

I did not register this protocol in an international database before starting the review.

1. **Funding and Conflicts of Interest**

This review did not receive any outside funding, and I have no conflicts of interest to declare.

# Characteristics of Included Studies

Following are the characteristics of included studies

| **Author, Year** | **Country** | **Study Design** | **Sample Size** | **Population** | **Stress Tool** | **Pain/QOL Tool** | **Intervention** | **Key outcomes** | **Notes** |
| --- | --- | --- | --- | --- | --- | --- | --- | --- | --- |
| Akbas 2019 | Turkey | RCT | 37 | Women with primary dysmenorrhea from university. | BAI , BDI | VAS, SF-36 | Aerobic Exercise Group (AEG):  • 4-week group aerobic training  • 3 sessions/week × 50 minutes (5-min warm-up, 40-min aerobic exercise, 5-min cool-down)  • Supervised by physiotherapist  Control Group:  • No intervention  • Usual activity | Stress, Pain, Quality of life | Out of all participants, 37 women completed the study. The aerobic exercise led to noticeable reductions in premenstrual symptoms and some improvements in quality-of-life areas, particularly social functioning. Pain intensity was lower at certain time points after menstruation began. However, there were no significant changes in anxiety or depression levels. The researchers used well-established measurement tools (PMSS, VAS, BAI, BDI, SF-36) and ensured outcome assessments were blinded, which adds to the study’s methodological strength. Still, the small sample size and participant dropout limit the overall certainty of the findings. |
| Alkhatib 2024 | China | RCT | 62 | International female students | PSS-10 | MSQ | Experimental group (Baduanjin exercise)  This group participated in a two-part program. During the first 12 weeks, participants attended supervised Baduanjin sessions, practicing together for 30 minutes each day under the guidance of three trained instructors. They also received daily reminders through WeChat and took part in weekly group discussions to share experiences  For the next 12 weeks, the program shifted to self-directed practice, with participants exercising on their own at scheduled times. They continued to receive weekly reminders via WeChat from a group leader. The Baduanjin exercises followed the official “Health Qigong Baduanjin Standard” and consisted of 10 different postures.  Control group  Participants in the control group were given written educational materials about factors that can affect menstrual symptoms, along with general recommendations for physical activities such as yoga, Pilates, and aerobics. They did not take part in any structured exercise program. | Stress, pain | Baduanjin exercise can improve psychological wellbeing and menstrual pain. |
| Burcu Küçükkaya 2024 | Turkey | RCT | 96 | Nursing Students | PSS | VAS | Music Group  • Song: 29 min 32 sec  • Delivered through headphones  • 4 days total: 3 days before menstruation + Day 1 of cycle  • Applied in 2nd and 3rd cycles  Drawing Group  • Draw for 29 min 32 sec  • Same schedule as music group  • 4 days total  Control Group  • No intervention | Stress, Pain | In this double-blind randomized controlled trial from Turkey, 96 participants were assigned to either a music or drawing intervention group, or a control group. Both the music and drawing groups experienced significant decreases in stress (measured by PSS) and pain (measured by VAS) compared to the control group over the course of two menstrual cycles (p < 0.001). The interventions were short-term and limited to those two cycles, so any longer-term effects remain unknown. The study’s risk of bias was rated as ‘some concerns,’ mainly due to the use of per-protocol analysis and missing outcome data. |
| Gunebacan 2023 | Turkey | RCT | 32 | Pre-menopausal women | STAI-I | MSS , NHP | Tele-yoga training (Hatha yoga) delivered via Zoom, 6 weeks, 2 sessions/week, 45 minutes/session, led by a certified instructor. Included warm-up, sun salutations, basic asanas, pranayama, and relaxation.  Control: No exercise program; participants completed baseline and 6-week assessments only. | Stress, Pain, Quality of Life | This randomized controlled trial from Turkey investigated whether a 6-week tele-yoga intervention could help reduce menstrual symptoms and enhance psychological wellbeing in healthy premenopausal women. Thirty-two participants were randomized, and all completed the study. Those in the yoga group experienced noticeable improvements in nearly all menstrual symptom scale (MSS) subcategories, including significant reductions in negative mood and somatic complaints (p=0.003), menstrual pain (p=0.003), difficulties coping (p=0.001), and overall MSS scores (p=0.001). Compared to the control group, quality-of-life indicators such as pain, energy, emotional reactions, sleep problems, social isolation, and total NHP score also improved significantly for the yoga group (all p<0.05). Depression scores decreased substantially (p=0.000), though anxiety and self-esteem remained largely unchanged. These findings suggest that a structured tele-yoga program can effectively lessen the burden of menstrual symptoms and promote multiple aspects of wellbeing. |
| Huang2022 | Taiwan | RCT | 45 | Female university students | Cortisol | VAS, SFMPQ | Each exercise session was 30-35 min in length, including a warm-up (5 min), the main sprint-exercise course (15-20 min), a cool-down (5 min), and a stretching period (5 min) for 10 weeks Comparator is Control ( Non- Dysmenorrhea) | Stress, pain | Both inflammation and hormonal balance play a role in dysmenorrhea. In this study, a HIIT intervention led to improved cardiovascular fitness and a significant reduction in pain, even though cortisol levels increased in both groups. The increase in cortisol reflects a physiological stress response, but does not necessarily indicate changes in psychological stress. |
| Mehboobeh 2016 | Iran | Clinical Trial | 67 | Female university students | STAI | VAS | • Intervention: Acupressure applied to LV3 point for two minutes, repeated for three cycles.  • Control: Pressure applied to a placebo point not related to dysmenorrhea. | Stress , pain | This clinical trial from Iran investigated whether applying acupressure to the LV3 point could lower anxiety in women with primary dysmenorrhea. The intervention spanned three menstrual cycles: the first session was supervised, and participants performed the remaining sessions on their own. By the third cycle, women in the acupressure group saw a noticeable decrease in anxiety scores, whereas those in the placebo group experienced little to no change. While the study also measured hidden (covert) anxiety, only minor changes were observed. Overall, these results indicate that LV3 acupressure may be effective in reducing visible anxiety related to dysmenorrhea. |
| Revankar 2025 | India | RCT | 80 | Adolescent school girls | 5-point self- structured scale | None | Study group received a nurse-led program including: * Stretching exercises (15 minutes/day for 5 weeks) * Booklets on menstrual hygiene and stress management * Iron-rich nutritional supplement (2 ladoos/day) | Stress | This randomized controlled trial looked at the effects of a five-week, nurse-led program that included exercise, education, and nutrition support on stress and menstrual health in adolescent girls in Navi Mumbai. The intervention group experienced a significant drop in stress levels (mean post-intervention score: 87.9 ± 8.53, p < 0.001), and after the program, none of the girls had severe stress—down from 45% at the start. Hemoglobin levels in this group also rose significantly (from 9.925 to 10.225 g/dL, p = 0.017). Overall, these results suggest that holistic, school-based interventions can make a real difference for adolescent girls' menstrual health and stress. |
| Song 2023 | Korea | RCT | 30 | Young women | PSS-10 ,STAI-  I | VAS | Pilates group: 24 Pilates sessions over 12 weeks (twice weekly, 50 min). * Warm-up + 7 mat exercises + additional strength/flexibility components. * Led by instructor with 8 years’ experience.  Control group: * Waitlist control—no exercise during study period. * Received intervention after study completion. | Stress, Pain | In this small randomized controlled trial, a 12-week Pilates program was compared to a waitlist control group among young women with primary dysmenorrhea. The two groups started out with similar characteristics. Those in the Pilates group experienced a marked decrease in menstrual pain (with VAS scores dropping from 7.6 to 2.4) and notable improvements in CMSS symptoms. While stress scores fell slightly in the Pilates group, the difference was not significant compared to controls. Overall, these findings suggest that Pilates may help lessen menstrual pain and symptom burden, but the small sample size means the results should be interpreted with caution. |
| Dailer 2024 | Iran | Before and after quasi experimental (Clinical Trial) | 100 | Unmarried female students | PSS-14 | SFMPQ | Stress Inoculation Training (SIT) – 8 weekly computerized counselling sessions (50 minutes each), delivered via personalized web links + WhatsApp follow-ups. Sessions included: identifying negative thoughts, relaxation training, stress-coping strategies, menstrual education, and home-practice exercises. | Stress, Pain | This before-and-after study looked at the impact of an eight-session Stress Inoculation Training program on 100 female students with primary dysmenorrhea. Over the course of three menstrual cycles following the intervention, both perceived stress and menstrual pain improved significantly. Perceived stress scores dropped from 25.0 at the start of the study to 20.9 after three months (p = 0.002). Pain intensity also steadily decreased, from 22.36 to 15.91 (p = 0.003). While these findings suggest that the program led to meaningful reductions in both stress and pain, it’s important to note that the lack of a control group and natural variations in the menstrual cycle may influence the interpretation of the results. |
| Parabhu 2019 | India | Non-randomized trial | 78 | College students | PSS | VMSS | Experimental group (Yoga asanas)  Performed 4 times/week, supervised twice weekly.  Asanas included:  1. Bhujangasana  2. Matsyasana  3. Vajrasana  4. Dhanurasana  5. Apanasana  6. Shavasana   • Each posture held 10 seconds, 5 repetitions.  • Total duration: 30 minutes/session with 30-second rests.  Control group (Core strengthening exercises)  1. Static core contraction – hold 10 seconds  2. Static back press – hold 10 seconds  Frequency matched with experimental group | Stress, pain | In this six-week, non-randomized controlled study, researchers examined how yoga postures might influence pain, menstrual symptoms, and stress in young women with primary dysmenorrhea. Seventy-eight women completed the study, with participants divided into a yoga group or a core-strengthening control group. Pain intensity (measured by VMSS), menstrual distress (MDQ), and stress (PSS) were assessed before and after the intervention.  The group practicing yoga experienced significant decreases in pain, menstrual symptoms, and stress, with all outcomes improving meaningfully (p < 0.05). While both groups saw some progress in menstrual symptoms, the reductions in pain (VMSS) and menstrual distress (MDQ) were much greater in the yoga group. Stress levels also dropped notably for those practicing yoga, though the difference between groups was not statistically significant. Overall, these results suggest that yoga may be a helpful non-drug approach for managing dysmenorrhea and stress in young women, but because of the study design, we should be cautious about drawing firm conclusions about cause and effect. |
| Payne 202 | USA | Single arm open trial | 20 | Medical students | BSI-18, BSI-anxiety | PCS, NRS | Cognitive–behavioral mind-body program, 5 sessions over 6 weeks  • Session 1: psychoeducation + mindfulness  • Session 2: automatic thoughts, mindfulness  • Session 3: de-catastrophizing  • Session 4: coping skills, relaxation  • Session 5: consolidation | Stress, pain | No change was observed in anxiety, depression or stress but pain catastrophizing and menstrual pain improved. No extractable numerical data (means/SDs) for pain or stress outcomes. Only regression coefficients and p-values were provided; therefore, results are included narratively but not in quantitative tables. |
| Alshayeb 2020 | Syria | Cross-Sectional observational | 980 | University students | PSS | Structred Questionnaire | None | Stress, Pain | This large cross-sectional study included 980 female medical students in Syria and explored how psychological stress, measured with the validated PSS scale, relates to different menstrual disorders. The study found that moderate to high stress was very common affecting 92% of the participants. Dysmenorrhea was also widespread, with a prevalence of 80%.  Statistical analysis revealed that higher stress levels were significantly linked to abnormal vaginal bleeding (p = 0.041), oligo menorrhea (p = 0.046), and overall menstrual irregularities (p = 0.028).  However, the study did not find a significant connection between stress levels and dysmenorrhea in particular (p = 0.252).  Key strengths of this study were its large sample size and the use of a validated tool (PSS) to measure stress. However, its reliance on self-reported data and the cross-sectional design mean that it cannot establish whether stress actually causes menstrual symptoms. |
| Awasthi 2025 | India | Prospective Cohort | 150 | Young women | PSS-14 | PBAC | None | Stress, Pain | This small pilot prospective cohort study involved 150 young Indian women aged 18 to 25. The researchers divided participants into two groups based on their perceived stress levels—those with high stress (PSS-14 ≥29) and those with lower stress (PSS <28)—and tracked them over the course of one menstrual cycle.  The primary finding from this study is straightforward: Women who reported higher levels of stress experienced heavier menstrual bleeding (as indicated by higher PBAC scores), more irregular menstrual cycles, longer periods of bleeding, and a greater history of dysmenorrhea. These relationships were statistically significant, for example, the correlation between PBAC scores and PSS was r = 0.179 (p = 0.007), and for dysmenorrhea, r = 0.246 (p = 0.014).  Since the sample size was small and participants were volunteers, this study provides preliminary evidence that higher stress may worsen menstrual symptoms, but it cannot prove a cause-and-effect relationship. |
| Bekmezci 2025 | Turkey | Descriptive Cross Sectional | 906 | Volunteer women | PSS | Categorical question (yes/No) | None | Stress, pain | In this large cross-sectional study conducted during the COVID-19 pandemic, researchers compared 418 women with primary dysmenorrhea to 488 women without the condition. They used the Perceived Stress Scale (PSS) to measure psychological stress and the Women’s Health Questionnaire (WHQ) to assess various health symptoms. Women with dysmenorrhea reported notably higher levels of depression, somatic complaints, cognitive-somatic symptoms, gastrointestinal problems, self-esteem concerns, and anxiety, with all differences reaching statistical significance (p < 0.01).  Interestingly, the dysmenorrhea group actually had slightly lower perceived stress scores than the control group (41.50 ± 8.04 vs. 43.21 ± 7.24; p = 0.001). Logistic regression analysis revealed that having relationship difficulties or premenstrual syndrome made it more likely for women to experience primary dysmenorrhea. While the difference in stress levels was statistically significant, it ran counter to most previous findings, and the cross-sectional design means we cannot draw conclusions about cause and effect.  This research provides valuable descriptive information on stress and psychological wellbeing among women with dysmenorrhea. However, because pain severity was not quantified, the study's findings are less suitable for inclusion in meta-analyses. |
| Bello 2025 | Nigeria | Cross Sectional Observational | 171 | University Students | PSS-10 | NRS | None | Stress, Pain | This cross-sectional study examined the relationship between dysmenorrhea and its severity. More than 96% of participants reported experiencing dysmenorrhea, and 36.6% classified their symptoms as severe. The average stress score (PSS-10) among participants was 18.32 ± 7.33. The mean severity score for dysmenorrhea was 5.54 ± 2.14. Stress was found to have a weak but positive correlation with the severity of dysmenorrhea (R = 0.29). QGC analysis showed that stress had the lowest weight (0.10), while anxiety had the greatest influence (0.36). Although there was a weak but positive link between stress and dysmenorrhea severity, anxiety emerged as the strongest predictor. These findings suggest that while psychological stress might play a part in menstrual pain, other mental health factors like anxiety are likely more important. |
| Dar 2025 | Pakistan | Descriptive Cross Sectional | 484 | Students | None | NPRS, EQ-5D-5L | None | Pain, Quality of Life | This large study from Sargodha, Pakistan looked at how primary dysmenorrhea (painful periods) affects the day-to-day lives of female university students. Using well-established questionnaires (EQ-5D-5L and EQ-VAS), the researchers found that students with moderate to severe period pain had more trouble with moving around, taking care of themselves, doing normal activities, dealing with pain and discomfort, and coping with anxiety or depression. Almost half of the participants had moderate period pain, and about one in five had pain that was severe. The results showed a strong link between how bad the pain was and how much it affected different areas of quality of life (p<0.001). Overall, this study shows that period pain can seriously impact both daily functioning and mental wellbeing, especially in settings where resources are limited. |
| Elah 2024 | Iraq | Cross-sectional analytical | 397 | Medical Students | PSS-10 | Questionnaire for pain | None | Stress, Pain | In this study involving 397 female medical students in Iraq, nearly all participants reported experiencing period pain (dysmenorrhea) and premenstrual syndrome (PMS), with rates of 92.9% and 98.5% respectively. Women who had higher stress levels, as measured by the PSS-10 scale, were more likely to also have period pain, PMS, or heavy menstrual bleeding. However, the study did not adjust for other factors that might influence these results and didn’t provide much detail on how severe the period pain was. Overall, the research suggests that higher stress is linked to more menstrual problems among young women. |
| Ertandri 2020 | Indonesia | Cross Sectional Comparative | 26 | Medical Students | Cortisol | None | None | Stress, pain | In this study, researchers compared morning cortisol levels in women with chronic primary dysmenorrhea (long-term period pain) to those without menstrual pain. While the group with dysmenorrhea had higher average cortisol levels (72.3 vs. 60.3 µg/dL), the difference wasn’t statistically significant (p = 0.148). Interestingly, all participants had cortisol levels much higher than what’s considered normal, which might point to problems with how the measurements were taken or reported.  The researchers concluded that chronic primary dysmenorrhea wasn’t linked to significantly higher cortisol levels, even though it makes sense biologically since the body’s stress response (HPA axis) is connected to how we feel pain. However, it’s important to keep in mind that the study had some important limitations: the number of participants was small, they didn’t account for factors like stress, anxiety, BMI, or smoking, and it’s not clear if the cortisol tests were reliable. |
| Fharizy 2021 | Indonesia | Cross Sectional Correlational | 50 | School Students | DASS-42 | Questionnaire for pain | None | Stress, Pain | This study from Indonesia looked at whether there was a connection between anxiety and period pain (primary dysmenorrhea) in high-school girls during the COVID-19 pandemic. Researchers used the DASS-42 questionnaire to measure anxiety and found that most girls had mild levels of both anxiety and period pain. The results showed a clear link: girls who felt more anxious were likely to have worse period pain (r = 0.418, p = 0.003). The study stands out because it used a well-established anxiety questionnaire and clearly categorized the severity of symptoms. However, relying on self-reported answers and collecting data online during the pandemic could affect the accuracy of the results. |
| Jacquelyn 2023 | India | Cross Sectional analytical | 201 | Volunteer | DASS | MSQ | None | Stress, pain | This cross-sectional study involved 201 women between the ages of 18 and 35 and found a surprising pattern: as menstrual pain got worse, levels of depression, anxiety, and stress actually went down a little. While the relationship was statistically significant, it was weak and the direction of the association was unexpected.  This finding goes against what most research and biological evidence usually show, which is that more menstrual pain is linked with higher levels of psychological distress. The researchers suggested that maybe pain distracts women from their worries, or that the body’s release of endorphins during pain could temporarily ease anxiety and depression.  It's important to be careful when interpreting these results because the study depended only on self-reported answers collected online, didn’t use clinical assessments to confirm pain or psychological symptoms, and relied on a sampling method that may not represent everyone. |
| Jain P 2023 | India | Cross Sectional Analytical | 397 | Medical students | PSS | X² | None | Stress, Pain | Participants in this study reported feeling stressed during every phase of their menstrual cycle, with stress being especially noticeable in the late follicular, late luteal, and menstrual phases. However, those with dysmenorrhea consistently had higher stress levels. There was a strong positive connection between perceived stress (measured by the PSS) and dysmenorrhea, with a correlation coefficient of 0.782 (p < 0.00001). The results are based on participants’ own reports of stress, and the study didn’t provide average values for dysmenorrhea symptoms. Because this was a cross-sectional study, it can’t show whether stress actually causes dysmenorrhea or vice versa. |
| Kordi 2013 | Iran | Prospective correlational | 150 | Midwives | DASS-21 | MDQ | None | Stress, pain | This study followed 150 midwives in Mashhad and examined how occupational stress relates to menstrual problems. Most participants experienced moderate or severe occupational stress (59.3%), and dysmenorrhea was very common (63%). Stress scores were significantly associated with menstrual complaints. Severe occupational stress had higher odds of dysmenorrhea (OR 2.7, 95% CI 2.0–3.8; p = 0.002). Stress level also correlated with longer menstrual bleeding (p = 0.004) and irregular menstrual cycles (p = 0.003). No significant relationship was found between stress and BMI, exercise, age at menarche, or depression/anxiety scores. Overall, women with higher job stress showed worse menstrual patterns, particularly more painful menstruation and longer bleeding duration. |
| Kusumavati 2023 | Indonesia | Quantitative Cross Sectional | 51 | University Students | DASS-42 | Pain Questionnaire | None | Stress, Pain | This cross-sectional study assessed 51 female university students to determine relationships among stress, dietary patterns, and primary dysmenorrhea severity. Stress was measured using the DASS-42 stress subscale, and dysmenorrhea severity was scored using a 12-item pain questionnaire. Most students experienced normal-to-moderate stress levels, and dysmenorrhea severity was predominantly mild or moderate.  A moderate positive correlation was found between stress level and dysmenorrhea severity (r = 0.495), indicating that higher stress was associated with more severe menstrual pain. Menarche age showed no significant association with pain severity, and eating consumption patterns showed only a weak relationship (r = 0.347). Overall, the study supports stress as an important factor in dysmenorrhea severity among university students, but generalizability is limited due to the small and non-random sample. |
| Lee 2024 | Cross Sectional | South Korea | 519 | School Girls | PSS, STAI | VAS | None | Stress, Pain | This large cross-sectional study demonstrated consistent associations between psychological factors and dysmenorrhea severity. Girls with higher stress levels had significantly higher VAS pain scores and CMSS symptom scores (all P < 0.001). Bivariate correlations showed strong positive associations between perceived stress and symptom severity (r = 0.357–0.479, all P < 0.001). Depression (r = 0.479) and anxiety (r = 0.351–0.382) were also strongly correlated with pain intensity and symptom frequency. Self-esteem showed inverse correlations with dysmenorrhea (e.g., r = −0.232 to −0.277, P < 0.001). Regression models identified depression (β = 0.37, P < 0.001), menstrual volume (β = 5.31, P < 0.001), trait anxiety (β = 0.15, P < 0.01), and stress (β = 0.10, P = 0.044) as independent predictors of symptom severity. Stress had indirect effects via anxiety and depression in mediation analysis. This suggests that emotional distress is a central contributor to dysmenorrhea among adolescents. |
| Lesnaya 2021 | Russia | Cross Sectional | 136 | Students | PSM-25 | Questionnaire | None | Stress, Pain | This cross-sectional study assessed whether psychological stress is associated with menstrual irregularities among 136 female university students aged 18–23.  Out of 136 students, 112 (82.4%) had menstrual disturbances, most commonly PMS (91.1%) and primary dysmenorrhea (85.7%). Stress was measured using the PSM-25 scale, and high stress levels were found significantly more often among students with menstrual irregularities (Group 1: 75%) compared with students with normal cycles (Group 2: 31.7%, p < 0.05).  Irregular cycles such as oligo menorrhea (23.2%), polymenorrhea (5.4%), and heavy bleeding (17.9%) were also frequently seen in the high-stress group. The analysis shows that students with high psychological stress were 3.5 times more likely to have irregular menstruation, 1.2 times more likely to have dysmenorrhea, and 1.1 times more likely to have PMS.  Depression levels (Beck scale) were also higher in Group 1, with 57.1% showing mild depressive symptoms, reinforcing the link between psychological distress and menstrual dysfunction.  Overall conclusion: This study strongly links high stress levels with:  • Menstrual irregularities  • Dysmenorrhea  • PMS  • PSM-25 stress ≥ high category far more common in Group 1 (75%) vs Group 2 (31.7%). |
| Matsumura 2023 | Japan | Analytical Observational | 289 | Working Women | K6 | Questionnaire | None | Stress, Pain | This large cross-sectional study of 289 working women in Tokyo investigated how dysmenorrhea severity relates to psychological distress, considering workplace and gynecologic factors.  About 18.3% of women experienced moderate/severe dysmenorrhea, and this group had much higher psychological distress (67.9%) compared with women with none/mild symptoms. In the unadjusted regression model, moderate/severe dysmenorrhea strongly predicted greater psychological distress (β≈3.17, p<0.001).  However, when adjusting for gynecologic factors, PMS symptoms, and finally workplace factors (Models 3–5), the direct effect of dysmenorrhea on psychological distress lost statistical significance. Instead, the strongest predictors were:  • Moderate/severe PMS physical symptoms  • Moderate/severe PMS psychological symptoms  • Lower job control  This suggests that dysmenorrhea is associated with greater distress, but much of the relationship is mediated through PMS severity and job-related stress exposure, not dysmenorrhea alone.  The study concludes that while dysmenorrhea is linked to distress, interventions targeting job control, PMS symptoms, and workplace support may have a greater impact on reducing psychological distress in working women. |
| Moraes 2025 | Brazil | Cross Sectional Analytical | 2505 | Volunteer | PSS-10 | NRS | None | Stress, Pain | This large cross-sectional study (n = 2505) examined associations between perceived stress and primary dysmenorrhea among Brazilian women. Higher pain intensity and greater symptom interference were significantly associated with higher stress levels (P < 0.001). Stress was also influenced by age, menarche age, and comorbid anxiety. Validated tools (PSS-10, NRS, DSI) and multivariable regression strengthened internal validity. Overall, the study suggests a strong positive association between dysmenorrhea severity and perceived stress, though causality cannot be inferred due to the cross-sectional design. |
| Mou 2019 | China | Cross Sectional Analytical | 807 | Nursing Students | DASS-21 | CMSS | None | Stress, Pain | This study looked at nearly 807 Chinese adolescent girls to understand how stress, negative emotions, loneliness, and relationship problems are connected to dysmenorrhea. The researchers found a very consistent pattern: girls with higher stress, anxiety, and depression scores had more severe and more frequent menstrual pain. Loneliness and interpersonal relationship troubles also showed a clear link with dysmenorrhea, but these effects were mostly explained by negative emotions(DASS-21, *β*=0.326, *p*<0.001)  Girls who were younger at menarche tended to have slightly worse symptoms. Romantic relationship status also played a role—those who reported being “in love” had higher emotional distress and more intense symptoms compared to girls not in a relationship. Stress and negative emotions show strong positive correlation with dysmenorrhea severity and frequency  Overall, this study supports a strong psychological component in dysmenorrhea, especially stress and emotional distress. |
| Muawanah 2025 | Indonesia | Analytical Observational | 100 | High School Students | PSS | Questionnaire | None | Stress, Pain | This cross-sectional study among 100 adolescent girls found that both iron intake and stress levels were significantly associated with primary dysmenorrhea. Girls with insufficient iron intake showed a higher prevalence of menstrual pain (61% vs. 46%), while those experiencing major stress were also more likely to report dysmenorrhea (p = 0.002). More than half of all participants experienced dysmenorrhea.  The authors note that inadequate nutrition and psychological stress may exacerbate prostaglandin production and uterine ischemia, contributing to menstrual pain. However, no confounders were controlled, and both dietary and stress measures relied on self-report, limiting causal interpretation. |
| Nagma 2015 | India | Cross Sectional | 100 | Voulnteer medical Students | PSS | Questionnaire | None | Stress, Pain | This cross-sectional study looked at 100 hostel-dwelling medical students and examined whether their stress levels were linked to menstrual issues. Stress was measured using the PSS, while menstrual patterns and bleeding were tracked for one cycle using PBAC. About 30% of students had high stress (PSS ≥20). The only clear finding was that students with higher stress were more likely to report irregular menstrual cycles (p=0.012). However, stress did not show a meaningful association with dysmenorrhea (p=0.132) , hypermenorrhea, menorrhagia, or abnormal cycle length. Because the sample was small and based on a single hostel population, the results should be interpreted cautiously. |
| Putri 2024 | Indonesia | Observational Analytical | 39 | Students | DASS | NRS | None | Stress, Pain | This cross-sectional study explored whether psychological stress is associated with primary dysmenorrhea among Indonesian high-school girls. Stress was measured using the DASS Stress Scale, and menstrual pain was quantified via the Numeric Rating Scale. The sample consisted of 39 students, with moderate pain (53.8%) being the most common severity level and moderate stress (28.2%) the most frequent stress category.  Statistical analysis using Spearman correlation showed a significant positive association between stress and dysmenorrhea severity (ρ = 0.347, p = 0.030). The direction of effect suggests that as stress levels increase, menstrual pain becomes more intense. Although the sample is small and cross-sectional (cannot infer causality), the study supports the hypothesis that stress contributes to worsening menstrual pain in adolescents. |
| Rafique 2018 | Saudia Arabia | Cross Sectional | 738 | Medical College Students | PSS-10 | Questionnaire | None | Stress, Pain | This large cross-sectional study from Saudi Arabia surveyed 738 female health-science students to explore menstrual problems and their relationship with psychological stress. Stress was measured using the PSS-10, and nearly 40% of participants fell into the high-stress category. Menstrual problems were extremely common—over 90% of students reported at least one issue.  A key finding was that students with higher stress scores were significantly more likely to report dysmenorrhea (p= 0.04 95 %CI 2.2  ,1 - 4.8 ), irregular menstruation, amenorrhea, and abnormal vaginal bleeding. For example, high-stress students were 2–3 times more likely to have irregular cycles or amenorrhea. Although the design cannot prove causality, the study clearly shows a strong association between elevated stress and several menstrual disturbances in this young population. |
| Rahayunighsih 2023 | Indonesia | Cross Sectional | 60 | Students | DASS-42 | Wong Baker Pain Scale | None | Stress, Pain | This cross-sectional study evaluated whether stress levels were associated with primary dysmenorrhea severity among 60 female Indonesian adolescents. Stress was measured using the validated DASS-42 stress scale, while pain severity was classified using the Wong-Baker Pain Scale. Most students reported moderate–severe pain (74.2%), and 53.2% showed mild-to-heavy stress. Chi-square analysis showed no significant relationship between stress and dysmenorrhea severity (OR = 1.19; 95% CI 0.38–3.72; p = 0.993), indicating that students with higher stress levels were not more likely to experience severe menstrual pain. The authors conclude that other factors—such as calcium intake, hormonal cycles, and exercise habits—may play a larger role in influencing pain severity in this population. |
| Saadah 2024 | Indonesia | Cross Sectional Analytical | 124 | High School Students | DASS-42 | NRS | None | Stress, Pain | This Indonesian cross-sectional study explored whether psychological stress contributes to dysmenorrhea among 124 adolescent girls. Stress was assessed using the DASS-42 stress subscale, and menstrual pain was scored with the NRS. Most girls reported moderate stress and moderate menstrual pain. The ordinal regression analysis showed a significant association between higher stress levels and increased odds of dysmenorrhea (p = 0.017). In simple terms, girls experiencing higher stress were more likely to report stronger menstrual pain. The study supports the idea that stress may play a meaningful role in triggering or worsening dysmenorrhea in adolescents. |
| Salsabila 2024 | United Kingdom | Cross Sectional | 128 | School Students | DASS | Questionnaire | None | Stress, Pain | This cross-sectional study of 128 adolescent high school girls (ages 13–17) assessed dysmenorrhea and psychological stress using the validated DASS scale. More than half of participants had moderate to very severe stress (74%). Dysmenorrhea was strongly associated with higher stress: 73.3% of girls with stress reported dysmenorrhea, compared with 34.8% in the no-stress group. Logistic regression showed a significant positive relationship (B = 1.640, p = 0.001), indicating that higher stress levels markedly increased the likelihood of dysmenorrhea. |
| Septianigrum 2019 | Indonesia | Cross Sectional Analytical | 46 | Nursing and midwifery students | Cortisol | VAS | None | Stress ,Pain | Cross Sectional observational study assessing correlation between menstrual pain and cortisol levels. Cortisol is used as proxy and psychological stress is not directly measured. Although cortisol levels were in normal range but study found a significant correlation between cortisol and menstrual pain ( p = 0.000) . No mean or SD values are reported for pain or cortisol. Newcastle-Ottawa Scale is used for this study and overall methodological quality is moderate (4/10). Key limitations: lack of adjustment for confounders, single site sample, no descriptive statistics for cortisol or VAS scores. |
| Situmorang 2024 | Indonesia | Cross Sectional Observational | 200 | University Students | PSS | VAS,NRS | None | Stress, Pain | This cross-sectional study examined 200 female university students aged 18–25 to evaluate the association between perceived stress and dysmenorrhea severity. Stress was measured using the validated PSS, and menstrual pain was assessed using VAS/NRS.  The prevalence of dysmenorrhea was high (82%), with a mean pain score of 6.3/10. Participants reported moderate–severe pain, and stress levels were also elevated (mean PSS = 18.7). Correlational analysis demonstrated a significant positive association between stress and menstrual pain (r = 0.42, p < 0.001). Regression analyses confirmed that stress remained an independent predictor of dysmenorrhea severity after adjusting for age, sleep, lifestyle, academic pressures, and financial concerns, explaining 38% of the variance.  Subgroup analysis showed stronger stress–pain correlation among students under high academic stress (r = 0.48). The study concludes that psychological stress plays a significant role in worsening menstrual pain and that sleep quality, academic stress, and financial concerns further exacerbate symptoms. No intervention component was included. |
| Sofiyati 2024 | Indonesia | RCT | 100 | Adolescent Girls | STAI | VAS | Acupressure vs Aromatherapy | Stress , Pain | This RCT compared acupressure and aromatherapy for menstrual pain among adolescent girls. Both interventions significantly reduced pain and anxiety, with acupressure showing slightly stronger immediate reductions( p < 0.01) Although well-structured, the study had no blinding and only short-term follow-up, which affects certainty but still provides meaningful evidence for mind–body interventions. |
| Stetsevych 2025 | Ukraine | Cross Sectional Analytical | 550 | Women who experienced COVID-19 | PSS-10 | Questionnaire | None | Stress, Pain | This cross-sectional study evaluated how COVID-19–related stress affected menstrual cycle characteristics in 550 women aged 18–45. Stress levels were measured using the validated PSS-10 scale. Menstrual cycle parameters before and after stress exposure were compared.  The study found clear disturbances in menstrual patterns after stress exposure. The duration of menstruation became irregular in 21% of women, increasing 1.56× compared to pre-stress. The number of women with regular cycles decreased from 86% to 72%, while irregular cycles increased from 14% to 28%. Pain intensity also shifted: the percentage of women reporting no pain dropped from 21% to 13%, and moderate to severe pain increased proportionally.  Menstrual blood loss indicators also worsened. The need to change pads at night increased from 14% to 29%, and the frequency of blood clots >1 cm rose from 22% to 32%. Overall, the findings strongly support that higher perceived stress is associated with more menstrual irregularities, increased bleeding volume, and increased pain.  However, due to the cross-sectional design, causality cannot be confirmed. |
| Syamsudi 2024 | Indonesia | Cross Sectional | 114 | Students | DASS-42 | NRS | None | Stress, Pain | This cross-sectional study of 114 Indonesian nutrition students aimed to explore whether stress, physical activity, and dietary intake were related to dysmenorrhea severity. Pain was measured using the Numeric Rating Scale (0–10) and stress was assessed using the DASS-42. Although dysmenorrhea prevalence was very high (91% reported pain), the study did not find any significant association between stress and dysmenorrhea severity (p=0.36). Similarly, physical activity levels were not associated with pain intensity. Dietary assessment using three 24-hour food recalls showed widespread micronutrient deficiency. Among dietary variables, only vitamin B12 intake was significantly correlated with dysmenorrhea severity, with lower B12 linked to more severe pain. The authors suggested that methodological limitations—self-report measures, cluster sampling, and limited sample variation—may explain the lack of association with stress or physical activity. |
| Thomann 2025 | Germany | Prospective Case Control | 40 | Volunteers | DASS-21 | NRS | None | Stress, Pain | This case–control study compared women with severe vs. mild menstrual pain. Women in the high-pain group showed much higher daily stress and negative feelings (like worry and anxiety) during the 10 days before their period, especially in the last 3 days (p=0.007). Their menstrual pain scores (mean, maximum, and disability) were all significantly higher too. Overall, the study suggests that rising stress and negative expectations right before menstruation are closely linked with worse pain. |
| Tiwari 2022 | India | Analytical Cross-Sectional | 56 | University Students | PSS | Chi-Square | None | Stress, Pain | This cross-sectional survey among 56 Pakistani female medical undergraduates examined whether stress level or BMI was associated with primary dysmenorrhea. Stress was measured using the validated PSS scale, while dysmenorrhea severity was graded into four categories (G0–G3). Most participants reported moderate or severe dysmenorrhea (approx. 70%), and around 84% had moderate perceived stress.  Analysis showed a statistically significant association between higher stress levels and the presence/severity of dysmenorrhea. However, stress and BMI categories (<18.5, 18.5–24.9, >25) were not significantly related to dysmenorrhea severity. The study relied entirely on self-reported online data with strict exclusion of gynecological diseases.  This evidence contributes to the observational literature linking psychological stress to dysmenorrhea but has limitations regarding representativeness, measurement accuracy, and confounding control. |
| Triwahyuningsii 2024 | Indonesia | Cross Sectional | 150 | Nulliparous students | DASS-42 | NRS | None | Stress, Pain | Stress and physical activity are positively and negatively correlated with Dysmenorrhea suggested by Pearson correlation coefficient r = 0.782 (stress) r= -0.748 ( physical activity) and p is < 0.001. No mean or SD values are available so results are used for narrative synthesis only. |
| Tufail 2022 | Pakistan | Cross Sectional | 49 | Volunteers | PSS-10 | VAS | None | Stress, Pain | This cross-sectional study investigated psychological stress (PSS-10) in 59 women presenting with new-onset menstrual disorders during the COVID-19 lockdown. Moderate-to-severe stress was highly prevalent (100% of participants), with 96.6% reporting moderate stress and 3.4% severe stress.  Dysmenorrhea was present in 52.5% of women. However, no statistically significant association was found between stress level and dysmenorrhea (p = 0.942). Similarly, stress was not significantly associated with menstrual pattern abnormalities (p = 0.587) or premenstrual syndrome (p = 0.625).  Although stress levels were high, the study design and small sample size limit causal inference. This study contributes descriptive data on stress and menstrual symptoms during the pandemic but offers limited evidence on stress–pain relationships. |

# Risk of Bias Assessment

**Following is the risk of bias assessment table for RCTs using Rob 2.**

| **Study** | Bias arising from the randomization process | Bias due to deviations from intended interventions | Bias due to missing outcome data | Bias in measurement of the outcome | Bias in selection of the reported result | Overall bias |
| --- | --- | --- | --- | --- | --- | --- |
| Akbas 2019 | Low Risk | Pain-VAS-Some Concerns Stress-BSI Anxiety- Some Concerns Quality of Life-SF-36-Some Concerns | Pain-VAS-Some Concerns Stress-BSI Anxiety- Some Concerns Quality of Life-SF-36-Some Concerns | Pain-VAS-Low Risk  Stress-BSI Anxiety- Low Risk Quality of Life-SF-36- Low Risk | Pain-VAS-Some Concerns Stress-BSI Anxiety- Some Concerns Quality of Life-SF-36-Some Concerns | Pain-VAS-Some Concerns Stress-BSI Anxiety- Some Concerns Quality of Life-SF-36-Some Concerns |
| Alkhatib2024 | Low Risk | Pain-MSQ- Some Concern Stress-PSS-Some Concern | Pain-MSQ- Low Risk Stress-PSS-Low Risk | Pain-MSQ- High Risk Stress-PSS-High Risk | Pain-MSQ- Some Concerns Stress-PSS- Some Concerns | Pain-MSQ- High Risk Stress-PSS-High Risk |
| Burcu Küçükkaya 2024 | Low Risk | Pain-VAS- Some Concerns Stress-PSS- Some Concerns | Pain-VAS- Low Risk Stress-PSS- Low Risk | Pain-VAS- Some Concerns Stress-PSS- Some Concerns | Pain-VAS- Some Concerns Stress-PSS- Some Concerns | Pain-VAS- Some Concerns Stress-PSS- Some Concerns |
| Gunebacan 2023 | Low Risk | Pain-MSS- Low Risk Stress-STAI- Low Risk NHP-Quality of life-Low Risk | Pain-MSS- Low Risk Stress-STAI- Low Risk  NHP-Quality of life-Low Risk | Pain-MSS- Some Concerns Stress-STAI- Some Concern NHP-Quality of life-Some Concern | Pain-MSS- Low Risk Stress-STAI- Low Risk NHP-Quality of life-Low Risk | Pain-MSS- Some Concern Stress-STAI- Some Concern NHP-Quality of life-Some Concern |
| Huang 2022 | Some Concerns | Pain-VAS-Some Concerns Pain-SFMPQ- Some Concerns Stress-Cortisol- Some Concerns | Pain-VAS-Low risk Pain-SFMPQ-Low Risk Stress-Cortisol-Low Risk | Pain-VAS-High Pain-SFMPQ-High Stress-Cortisol-Low Risk | Pain-VAS-Low Risk Pain-SFMPQ-Low Risk Stress-Cortisol-Low Risk | Pain-VAS-High Risk Pain-SFMPQ-High Risk Stress-Cortisol-Some Concerns |
| Mehboobeh 2016 | Some Concerns | Stress- STAI-Low risk | Stress- STAI-Low risk | Stress- STAI-Low risk | Stress- STAI-Some Concern | Stress- STAI-Some Concern |
| Revankar 2025 | Low Risk | Stress-Questionnaire-Some concerns | Stress-Questionnaire-Low Risk | Stress-Questionnaire-High Risk | Stress-Questionnaire-Low Risk | Stress-Questionnaire-High Risk |
| Song 2023 | Some Concerns | Stress-PSS-High Risk Pain-VAS-High Risk | Stress-PSS-Low Risk Pain-VAS-Low Risk | Stress-PSS-High Risk Pain-VAS-High Risk | Stress-PSS-Some Concerns Pain-VAS-Some Concerns | Stress-PSS-High Risk Pain-VAS-High Risk |
| Sofiyati 2024 | Some Concerns | Stress- STAI-High Risk Pain-VAS-High risk | Stress- STAI-High Risk Pain-VAS-High risk | Stress- STAI-Some Concern Pain-VAS-Some Concern | Stress- STAI-High Risk Pain-VAS-High risk | Stress- STAI-High Risk Pain-VAS-High risk |

**Following is the risk of bias assessment table for Non-RCTs using ROBINS-I.**

| **Study** | **Bias Due to Confounding** | **Bias in Selection of Participants** | **Bias in Classification of interventions** | **Bias due to deviations from intended interventions** | **Bias due to missing Data** | **Bias in measurement of outcomes** | **Bias in selection of the reported result** | **Overall Risk** |
| --- | --- | --- | --- | --- | --- | --- | --- | --- |
| Dailer 2024 | Serious | Moderate | Low | Moderate | Low | Moderate | Moderate | Serious |
| Payne 2020 | Serious | Moderate | Low | Moderate | Moderate | Moderate | Moderate | Serious |
| Parabhu 2019 | Serious | Moderate | Low | Moderate | Low | Serious | Moderate | Serious |

**Following is the risk of bias assessment table for Observational Studies using New Castle Ottawa Scale.**

| **Study** | **Selection (Maximum 4 Star)** | **Comparability (Maximum 2 Star)** | **Outcome (Maximum 3 Star)** | **Total Score and Quality** |
| --- | --- | --- | --- | --- |
| Alshayeb 2022 | 3 | 0 | 3 | 6/9 Moderate |
| Awasthi 2025 | 3 | 0 | 2 | 5/9 Moderate |
| Bekmezci 2025 | 3 | 1 | 3 | 7/9 High |
| Bello 2025 | 3 | 1 | 3 | 7/9 High |
| Dar 2025 | 3 | 0 | 3 | 6/0 Moderate |
| Elah 2024 | 3 | 0 | 2 | 5/9 Moderate |
| Ertandri 2020 | 1 | 0 | 3 | 4/9 Low |
| Fharizy 2021 | 1 | 0 | 2 | 3/9 Low |
| Jacquelyn 2023 | 2 | 0 | 3 | 5/9 Moderate |
| Jain P 2023 | 1 | 0 | 2 | 3/9 Low |
| Kordi 2013 | 2 | 0 | 3 | 5/9 Moderate |
| Kusumavati 2023 | 2 | 0 | 2 | 4/9 Low |
| Lee 2024 | 3 | 2 | 3 | 8/9 High |
| Lesnaya 2021 | 3 | 0 | 2 | 5/9 Moderate |
| Matsumura 2023 | 3 | 2 | 2 | 7/9 High |
| Moraes 2025 | 3 | 2 | 2 | 7/9 High |
| Mou 2019 | 3 | 1 | 2 | 6/9 Moderate |
| Muawanah 2025 | 0 | 0 | 2 | 2/9 Low |
| Nagma 2015 | 2 | 0 | 3 | 5/9 Moderate |
| Putri 2024 | 1 | 0 | 2 | 3/9 Low |
| Rafique 2018 | 3 | 1 | 2 | 6/9 Moderate |
| Rahayunighsih 2023 | 2 | 0 | 3 | 5/9 Moderate |
| Saadah 2024 | 3 | 0 | 3 | 6/9 Moderate |
| Salsabila 2024 | 1 | 0 | 3 | 4/9 Low |
| Septianigrum 2019 | 2 | 0 | 2 | 4/9 Low |
| Situmorang 2024 | 3 | 2 | 3 | 8/9 High |
| Stetsevych 2025 | 2 | 0 | 2 | 4/9 Low |
| Syamsudi 2024 | 2 | 1 | 3 | 6/9 Moderate |
| Thomann 2025 | 3 | 1 | 2 | 6/9 Moderate |
| Tiwari 2022 | 2 | 0 | 1 | 3/9 Low |
| Triwahyuningsii 2024 | 3 | 0 | 2 | 5/9 Moderate |
| Tufail 2022 | 2 | 0 | 2 | 4/9 Low |
